# Supplementary material for: Biological Networks Underlying Abiotic Stress Tolerance in Temperate Crops—A Proteomic Perspective
Source: MDPI journal article supplement (doi:10.3390/ijms160920913), 2015-09-01
Supplement: s1 [file s1]

## Supplementary Information

**Table S1.** A list of proteomic studies focused on abiotic stress responses in selected temperate crops.

| Plant Material                                                                                | Treatment                                     | Methods                                                                                | Major Differentially-Abundant Proteins (DAP)                                                                                                                                                                                                                               | Reference |
|-----------------------------------------------------------------------------------------------|-----------------------------------------------|----------------------------------------------------------------------------------------|----------------------------------------------------------------------------------------------------------------------------------------------------------------------------------------------------------------------------------------------------------------------------|-----------|
| <b>Low temperature (cold, frost)</b>                                                          |                                               |                                                                                        |                                                                                                                                                                                                                                                                            |           |
| Winter wheats ( <i>Triticum aestivum</i> )<br>Mironovskaya 808 (T) and<br>Bezostaya 1(t)—leaf | 2 °C (21 days)                                | 0.1 M Tris-HCl, pH 9;<br>2DE LC-MS/MS                                                  | Up: WCS120, WCS19,<br>COR14a—higher levels in T                                                                                                                                                                                                                            | [109]     |
| Winter wheats Norstar (T)<br>and Azar2 (t)—leaf                                               | 2 °C (0, 14, 28,<br>42, 56 days)              | 2DE MALDI-TOF/TOF                                                                      | Up: COR/LEA (WCOR14a, WRAB17, WRAB18);<br>Cu/Zn-SOD, 2-2-Cys Prx, GST—higher levels in T                                                                                                                                                                                   | [69]      |
| Winter wheat<br>Cheyenne (T)—leaf                                                             | 4 °C (63 days)                                | TCA/acetone;<br>2DE MS/MS                                                              | Up: WCOR18, WRAB17, WCOR615; VER2,<br>glycine-rich RNA binding protein                                                                                                                                                                                                     | [61]      |
| Winter wheat cv.<br>Norstar (T)—crown                                                         | 4 °C (1, 23, 53 days)                         | Y2H ( <i>Saccharomyces cerevisiae</i> ); split GFP<br>( <i>Nicotiana benthamiana</i> ) | Interaction partners: TaVRT-1/VRN-1, TaVRT-2, VRN-2,<br>TaAP2, TaHD, TaFT (vernalization and development<br>regulation); RanGTP, phospholipase C, receptor-like<br>protein kinase (stress signaling)                                                                       | [145]     |
| Spring wheat<br>Kohdasht (S)—leaf                                                             | 4 °C (42 days)<br>Control: 20 °C<br>(42 days) | 2DE nanoLC-MS/MS                                                                       | Up: APX, DHAR, COR/LEA, cysteine proteinase, proteasome<br>subunit $\alpha$ Down: glycolysis (GAPDH, TPI), Krebs cycle<br>enzymes (MDH), ATP synthase $\beta, \epsilon$ ; PSII subunits                                                                                    | [60]      |
| Winter wheats Mironovskaya<br>808 (T) and Bezostaya 1 (t)—crown                               | 6 °C (0, 3, 21,<br>84 days)                   | TCA/acetone/phenol;<br>2D-DIGE<br>MALDI-TOF/TOF                                        | 298 DAP (202 identified) Up: 3-PGK, TPI, PGM, ENO;<br>HSP70; MDAR, DHAR, GPX, GST Down: ALDO, GAPDH;<br>SUS1, UDP-glucose pyrophosphorylase; 14-3-3; HSP90; APX<br>Vernalization: Chopper chaperone Genotypic differences:<br>MDH, legumin-like protein—higher in T than t | [75]      |
| Wheat cv. Yumai 34—leaf                                                                       | -5 °C (3 days)                                | 2DE MALDI-TOF/TOF                                                                      | 75 DAP—Up: 52 (COR/LEA, APX,<br>Cu/Zn-SOD, Trx M) Down: 18 (RubisCO LSU, SSU)                                                                                                                                                                                              | [70]      |
| Winter wheat Samanta (T), spring<br>wheat Sandra (S)—crown                                    | 4 °C (0, 3, 21 days)                          | TCA/acetone/<br>phenol; 2D-DIGE<br>MALDI-TOF/TOF                                       | 58 DAP (36 identified) Up: GAPDH, $\beta$ subunit ATP synthase,<br>CPN60- $\alpha$ , CPN60- $\beta$ Down: FRK-2, SUS1, 11S seed storage<br>protein Genotypic differences: methionine synthase, eIF3,<br>eIF5A2—higher in T; VER2, sGRP—higher in S                         | [62]      |

Table S1. Cont.

| Plant Material                                                                    | Treatment                                                  | Methods                                       | Major Differentially-Abundant Proteins (DAP)                                                                                                                                                                                                                       | Reference |
|-----------------------------------------------------------------------------------|------------------------------------------------------------|-----------------------------------------------|--------------------------------------------------------------------------------------------------------------------------------------------------------------------------------------------------------------------------------------------------------------------|-----------|
| Winter wheats—Shixin 828 (T), Shiluan 02-1 (t)—leaf                               | −8 °C (5 h)                                                | TCA/acetone; 2DE<br>MALDI-TOF/TOF             | RubisCO LSU and SSU; $\alpha$ and $\beta$ subunit ATP synthase; V-ATPase; MDH; Genotypic differences: RubisCO LSU and SSU, PRK; Mn-SOD—higher in T than t                                                                                                          | [97]      |
| Wild wheat ( <i>Triticum urartu</i> )—leaf                                        | 4 to 6 °C (28 days) followed by −2 °C (12 h)               | TCA/acetone; 2DE<br>MALDI-TOF/TOF             | 34 identified proteins—25 up- and 9 down-regulated Up: LEA-III, WCOR14, PR4; OEE1, chloroplastic ribosomal protein L12 Down: RubisCO SSU                                                                                                                           | [101]     |
| Barley ( <i>Hordeum vulgare</i> )<br>Winter barley<br>Luxor (T)—crown, leaf       | 3 °C (0, 1, 21 days),<br>−3 °C (1 day)                     | TCA/acetone/phenol;<br>2D-DIGE<br>MALDI-TOF   | Up: HSP70; OEE1 (PsbO), Down: eEF-Tu; GS1 and 2; UDP-glucose 6-dehydrogenase Both leaf and crown: AAA ATPase, V-ATPase; eEF-Tu, CPN60, 60S and 40S ribosomal proteins; GS                                                                                          | [118]     |
| Chicory ( <i>Cichorium intybus</i> )—root                                         | 5 °C (several days)                                        | 2DE<br>MALDI-TOF/TOF                          | 619 identified proteins (most abundant: actin, $\beta$ -7 tubulin, NDPK, Cu/Zn-SOD, TPI)                                                                                                                                                                           | [40]      |
| Sunflower ( <i>Helianthus annuus</i> ) cvs Hopi (S), PI543006, BSD-2-691 (T)—leaf | 15/5 °C (day/night)—<br>7 days                             | 2DE LC-MS/MS,<br>spectral counting            | Identified proteins: 718 (Hopi), 675 (PI543006), 769 (BSD-2-691) (lipocalin, Trx, 60S ribosomal protein L10A, L4-2, chloroplast 30S ribosomal protein S4)                                                                                                          | [32]      |
| <b>Heat</b>                                                                       |                                                            |                                               |                                                                                                                                                                                                                                                                    |           |
| Common wheat—Fang (T), Wyuna (S)—grain endosperm                                  | 40/25 °C (day/night)—<br>15,16,17 days<br>post-anthesis    | TCA/acetone 2DE<br>MALDI-TOF;<br>MS/MS Q-TOF  | Genotypic differences: Seven small HSP (16.9 kD class I HSP) proteins unique to T                                                                                                                                                                                  | [113]     |
| Common wheat—Thésée—grain                                                         | 34/10 °C (day/night)—<br>697 and 763 °C-d<br>(degree-days) | Sodium-phosphate<br>buffer;<br>2 DE MALDI-TOF | 42 identified proteins Up: 20 kD sHSP, 17 kD class II HSP; HSP82 (HSP90 family); eEF-Tu, V-ATPase subunit E Down: starch biosynthesis enzymes granule-bound starch synthase, glucose-1-phosphate adenyltransferase; $\beta$ -amylase; $\beta$ subunit ATP synthase | [114]     |

Table S1. Cont.

| Plant Material                                                  | Treatment                                                                               | Methods                       | Major Differentially-Abundant Proteins (DAP)                                                                                                                                                                                                             | Reference |
|-----------------------------------------------------------------|-----------------------------------------------------------------------------------------|-------------------------------|----------------------------------------------------------------------------------------------------------------------------------------------------------------------------------------------------------------------------------------------------------|-----------|
| Alfalfa ( <i>Medicago sativa</i> ) cv. Huaiyin—leaf             | 40 °C (24, 48, 72 h)                                                                    | 2DE MALDI-TOF/TOF             | 81 DAP: GS, PDI, peptidyl-prolyl <i>cis-trans</i> isomerase, RubisCO activase, sHSPs, IFR; Tic40, Toc75—chloroplast import machinery                                                                                                                     | [38]      |
| <b>Drought</b>                                                  |                                                                                         |                               |                                                                                                                                                                                                                                                          |           |
| Common wheat—spring wheats Arvand, Khazar-1, Kelk Afghani—grain | Field conditions (Azarbayjan) plus artificial irrigation                                | 2DE MALDI-TOF/TOF             | 121 (57 identified) Up: Trx <i>h</i> , 1-Cys peroxiredoxin, GST; PDI; LEA, sHSP17, HSP70                                                                                                                                                                 | [105]     |
| Wheat Iranian landraces N14, N49—stem (senescence stage)        | 80%–90% FWC (control), 50% FWC (drought)—10, 20, 30 days after anthesis                 | 2DE MALDI-TOF/TOF; Q-TOF      | 135 DAP (82 identified)—redox (GST, Prx-5, Trx M), chaperonin, protein metabolism (chloroplast 50S ribosomal protein L4, proteasome regulatory subunit 14, Clp protease)                                                                                 | [89]      |
| Australian wheats Kukri (S), Excalibur, RAC875 (T)—leaf         | Water withholding until leaf wilting in Kukri (S)—14, 24 days, and rewatering (25 days) | TCA; nanoLC-MS/MS iTRAQ 8plex | 1299 identified proteins Increase in ROS metabolism-associated proteins (CAT, Cu/Zn-SOD, Mn-SOD), decrease in photosynthesis and Calvin cycle-related proteins (RubisCO; PSI subunit VII PsaC) Genotypic differences: COR410—higher increase in T than S | [132]     |
| Wheat spring genotypes Ninchun 4, Chinese Spring—grain          | 14 days after flowering                                                                 | 2DE MALDI-TOF, MALDI-TOF/TOF  | 152 DAP (96 identified)—Up: TCTP, Down: APX, RubisCO                                                                                                                                                                                                     | [120]     |
| Common wheat cv. Nesser (T), Opata M85 (S)—root                 | 21 °C; 40 % humidity—combined effect of drought and ABA (100 μM)                        | nanoLC-MS/MS iTRAQ            | 1656 identified proteins 805 ABA-responsive proteins: LEA, protein phosphatases PP2C; Genotypic differences: HSP70, HSP90; 14-3-3, G-proteins; V-ATPase—higher in T; β-expansin, porins—higher in S                                                      | [57]      |
| Wheat cvs. Seri M82 (T), SW89.5193 (S)—leaf, root               | 80% FWC (control), 20% FWC (drought)                                                    | 2DE nanoLC-ESI-MS/MS          | Up: GST, SOD Genotypic differences: MDH, SAMS—up in T; 14-3-3—down in S                                                                                                                                                                                  | [88]      |

Table S1. Cont.

| Plant Material                                                                              | Treatment                                                                                                   | Methods                                             | Major Differentially-Abundant Proteins (DAP)                                                                                                                                                                                                                                                                                       | Reference |
|---------------------------------------------------------------------------------------------|-------------------------------------------------------------------------------------------------------------|-----------------------------------------------------|------------------------------------------------------------------------------------------------------------------------------------------------------------------------------------------------------------------------------------------------------------------------------------------------------------------------------------|-----------|
| Durum wheat cv. Ofanto—leaf                                                                 | 70 % FWC for 7 days (control); 57% FWC for 7 days (stress)                                                  | 175 mM Tris-HCl, pH 8.8, TCA-acetone; 2DE MALDI-TOF | 36 identified proteins Up: carbonic anhydrase, RubisCO LSU Down: RubisCO SSU, Calvin cycle enzymes (ALDO, PRK); ATP synthase CF1 $\alpha$ ; plastidic GS2a,b,c                                                                                                                                                                     | [30]      |
| Durum wheat cv. Kiziltan (S), emmer ( <i>T. dicoccoides</i> ) lines TR39477, TTD22 (T)—leaf | 9 days water withholding                                                                                    | 2DE nanoLC-ESI-MS/MS                                | 75 identified proteins, 11 candidates for drought tolerance Genotypic differences: TPI, ATP synthase CF1 (efficient carbohydrate metabolism and ATP production)—higher in T; $\beta$ -1,3-glucanase, $\beta$ -1,4-glucanase, XET (cell wall remodelling for osmotic adjustment and energy source); methionine synthase—higher in S | [96]      |
| Barley cv. Basrah (T) and Golden Promise (S)—leaf, root                                     | 7 days water withholding Control: 80% RWC; Drought: 70% RWC (T), 60% RWC (S)                                | 10 mM PBS, TCA-acetone; 2D-DIGE MALDI-TOF           | Identified proteins: 24 (leaf), 45 (root) Up: ABA-induced protein r40c1, small G-protein Rab2, Myb-like protein, 14-3-3 protein Down: GST, GPX Genotypic differences: Enhanced regulation of ROS (APX, CAT, LOX, class III POX) and protein folding in T than in S                                                                 | [59]      |
| Barley—8 Egyptian accessions, 2 selected for proteome analysis 15141 (T), 15163 (S)—leaf    | 24 °C; 70% FWC (control); 5 days at 10% FWC (stress)                                                        | TCA/acetone; 2D-DIGE MALDI-TOF                      | Up: PDI, Hsp90, Hsp100 (Clp protease), chloroplastic ATP synthase CF1 $\alpha$ ; Genotypic differences: PPKK, Hsp70, zinc metalloprotease—higher in T than S; proteins involved in osmolyte biosynthesis (betaine aldehyde dehydrogenase, methionine synthase, SUS1)—higher in S than T                                            | [86]      |
| Barley cv. Golden Promise—leaf                                                              | Ca 100% FWC (control); 25% FWC (stress)—28 days—combined effect of drought and <i>Piriformospora indica</i> | TCA/acetone; 2DE MALDI-TOF/TOF                      | 45 identified proteins Up: RubisCO activase A, RubisCO SSU, CCOMT Down: PRK, ACP Effect of <i>P. indica</i> : RubisCO SSU, PSI Fe-S, chl <i>a/b</i> binding protein; CCOMT, APX, 30S ribosomal protein 3, V-ATPase, 2-Cys Prx—higher in inoculated than control plants under stress                                                | [56]      |

Table S1. Cont.

| Plant Material                                                     | Treatment                                                    | Methods                                 | Major Differentially-Abundant Proteins (DAP)                                                   | Reference |
|--------------------------------------------------------------------|--------------------------------------------------------------|-----------------------------------------|------------------------------------------------------------------------------------------------|-----------|
| Barley lines 004186 (S), 004223 (T)—shoot                          | 20% PEG; 3 days water withholding                            | 2DE MALDI-TOF, nanoLC-MS/MS             | Up: V-ATPase, MDH, OEE (T), HSP70—up (T), down (S) Down: RubisCO activase (S)                  | [94]      |
| Barley cv. Amulet—crown                                            | 30, 35% SWC (14 days)                                        | 2D-DIGE MALDI-TOF/TOF                   | 105 DAP—82 identified—Up: GPX, GST, chitinase II Down: cdc48, GID1L2, OEE1,2                   | [83]      |
| Alfalfa ( <i>Medicago sativa</i> ) cv. Magali—leaf                 | 7 days water withholding                                     | 2DE ESI-LC-MS/MS                        | Up: 2Cys-Prx, 14-3-3; DHAR, SOD Down: mtATP synthase CF1 $\beta$ , PRK, SBP                    | [36]      |
| Maize ( <i>Zea mays</i> ) lines F2, <i>Io</i> —leaf                | 0, 14 days water withholding                                 | 2DE Edman sequencing                    | Up: cystatin, COMT, ENO, MDH, PPase, $\beta$ -1,3-glucosidase                                  | [119]     |
| Maize lines F2, <i>Io</i> —leaf                                    | 3,4,5 days water withholding                                 | 2DE Edman sequencing, nano LC ESI-MS/MS | Up: CCOMT, COMT, methionine synthase, SAMS                                                     | [133]     |
| Maize line FR697—root elongation zone—cell wall (apoplast)         | -0.03 MPa (control); -1.6 MPa (dehydration)                  | 2DE HPLC-ESI-Q-TOF MS                   | Cell wall apoplast proteins: expnasin, XET, $\beta$ -D-glucosidase                             | [135]     |
| Maize genotypes CE704, 2023—leaf                                   | 6 days water withholding                                     | 2DE MALDI-TOF, iTRAQ                    | Several isoforms (HSP26, HSP70, 14-3-3)                                                        | [117]     |
| Soybean ( <i>Glycine max</i> ) cv Taegwang—root                    | 79, 62, 46, 29, 23% FWC (5 days); recovery: 85% FWC (4 days) | 2DE MALDI-TOF                           | 45 DAP (CCOMT, IFR; regulatory proteins (MADS-box TF KIP—down under stress, up under recovery) | [74]      |
| Sugar beet ( <i>Beta vulgaris</i> )—enotypes 7112, 7219-P6.9—leaf  | 157 days—field; irrigated (control), non-irrigated (drought) | 2DE LC-MS/MS                            | 157 DAP (20 identified—RubisCO, sHSP, NDPK, redox regulation Down: $\alpha$ -NAC)              | [82]      |
| Sunflower ( <i>Helianthus annuus</i> ) lines RGK21 (S), BGK329 (T) | Field experiment—water withholding at flowering stage        | 2DE nanoLC-MS/MS                        | Genotypic differences: APX, Cu/Zn-SOD; ENO, PGM—up in T, down in S; CHS—up in S, down in T     | [33]      |

Table S1. Cont.

| Plant Material                                                                                        | Treatment                                                                       | Methods                                                                                            | Major Differentially-Abundant Proteins (DAP)                                                                                                                                                                                                         | Reference |
|-------------------------------------------------------------------------------------------------------|---------------------------------------------------------------------------------|----------------------------------------------------------------------------------------------------|------------------------------------------------------------------------------------------------------------------------------------------------------------------------------------------------------------------------------------------------------|-----------|
| root                                                                                                  |                                                                                 |                                                                                                    |                                                                                                                                                                                                                                                      |           |
| Wild watermelon<br>( <i>Citrullus lanatus</i> )—leaf                                                  | 50%–60% FWC                                                                     | 2DE Edman sequencing                                                                               | 6 DAP—HSP70, vegetative storage protein                                                                                                                                                                                                              | [115]     |
| <b>Osmotic stress (PEG-6000)</b>                                                                      |                                                                                 |                                                                                                    |                                                                                                                                                                                                                                                      |           |
| Common wheat cv<br>Yumai 34—leaf                                                                      | Hoagland solution, 15%<br>PEG-6000 (3 days); 0.5 mM<br>SA pretreatment (3 days) | TCA/acetone; 2DE<br>MALDI-TOF/TOF                                                                  | 82 (76 identified proteins), of which 35 SA-responsive<br>proteins Up: 14-3-3; APX, GST, SA-responsive proteins:<br>GS1c, GST1, PDI; ATP synthase CF1 $\alpha,\beta$                                                                                 | [55]      |
| Common wheat—spring<br>wheats Abbondanza (T),<br>Qingchun 38 (S)—leaf                                 | PEG-6000 (–1 MPa; 72 h),<br>recovery (24 h)                                     | TCA/acetone; 2DE<br>MALDI-TOF/TOF                                                                  | 38 (35 identified proteins) Up: GAPDH B; 26S<br>proteasome, V-ATPase A Down: RubisCO LSU and SSU,<br>GAPDH, TPI, AGPase (starch biosynthesis) Genotypic<br>differences: Less PEG-affected proteins in T than S                                       | [87]      |
| Common wheat cv Hanxuan<br>10 (T) and Ningchun 47<br>(t)—seedling leaf                                | Hoagland solution,<br>20% PEG-6000<br>(–075 MPa) for 48 h                       | TCA/acetone/phenol;<br>phosphopeptide enrichment<br>via TiO <sub>2</sub> microcolumns;<br>LC-MS/MS | 173 (T) and 251 (t) phosphoproteins identified Phosphoproteins<br>identified: signalling (SnRK2 kinase, protein phosphatase 2C,<br>CDPK, calmodulin 2-2); transport (AQP, MSSP2; H <sup>+</sup> -ATPase);<br>LEA proteins (WCOR719, WCOR825, WRAB17) | [51]      |
| Maize ( <i>Zea mays</i> )—seedling<br>leaf—membrane fraction                                          | Hoagland solution,<br>16% PEG-6000 (8 h)                                        | 2DE MALDI-TOF                                                                                      | Up: 17 (RubisCO activase, ATP synthase CF1 $\beta$ , OEE1,<br>ferredoxin-NADP reductase) Down: 18 (ATP synthase CF1 $\alpha,\gamma$ ;<br>50S ribosomal protein L28)                                                                                  | [84]      |
| Soybean ( <i>Glycine max</i> ) cv<br>Enrei—seedling root and<br>hypocotyl plasma<br>membrane fraction | 10% PEG-6000 (2 days)                                                           | 2DE, nanoLC-MS/MS                                                                                  | Up: calnexin, H <sup>+</sup> -ATPase, ribosomal protein S10, TPI                                                                                                                                                                                     | [50]      |

Table S1. Cont.

| Plant Material                                                                                                                         | Treatment                                        | Methods                                   | Major Differentially-Abundant Proteins (DAP)                                                                                                                                                                                                                                          | Reference |
|----------------------------------------------------------------------------------------------------------------------------------------|--------------------------------------------------|-------------------------------------------|---------------------------------------------------------------------------------------------------------------------------------------------------------------------------------------------------------------------------------------------------------------------------------------|-----------|
| Sunflower ( <i>Helianthus annuus</i> ) cv. Peredovick—leaf                                                                             | PEG-6000: -0.05 MPa (control), -0.6 MPa (stress) | 2DE MALDI-TOF                             | 19 marker proteins—Up: CCOMT, FRK, Cu/Zn-SOD, GRP-RNA binding protein                                                                                                                                                                                                                 | [134]     |
| <b>Waterlogging</b>                                                                                                                    |                                                  |                                           |                                                                                                                                                                                                                                                                                       |           |
| Common wheat ( <i>T. aestivum</i> ) cv. Shiroganekomugi—seedling root                                                                  | 2 days waterlogging                              | 2DE nanoLC-MS/MS                          | 15 DAP—Up: methionine synthase, $\beta$ -1,3-glucanase, $\beta$ -glucosidase, chitinase III, ENO, MDH                                                                                                                                                                                 | [136]     |
| Maize ( <i>Zea mays</i> ) A3237 (T), A3239 (S)—seedling root                                                                           | 7 days waterlogging                              | iTRAQ LC-MS/MS                            | 3318 identified; 211 DAP—Up: ADH, NADP-ME, XET6, GST,                                                                                                                                                                                                                                 | [100]     |
| Soybean ( <i>Glycine max</i> ) cv. Enrei—root cell wall                                                                                | 2 days waterlogging                              |                                           | 204 identified cell wall proteins—16 DAP Down: GLP, LOX, stem glycoprotein, Cu/Zn-SOD; pI change in copper amino oxidase                                                                                                                                                              | [123]     |
| Tomato ( <i>Lycopersicon esculentum</i> ) cv Koma—leaf                                                                                 | 2 cm water above soil surface (24, 48, 72 h)     | 2DE MALDI-TOF, ESI-MS/MS                  | 52 DAP (33 identified—Up: MIPS; Down: ATP synthase CF1 $\alpha$ , $\beta$ )                                                                                                                                                                                                           | [116]     |
| <b>Salinity</b>                                                                                                                        |                                                  |                                           |                                                                                                                                                                                                                                                                                       |           |
| Common wheat ( <i>T. aestivum</i> ) Jinan 177 (S), <i>T. aestivum</i> $\times$ <i>Thinopyrum ponticum</i> Shanrong 3 (T)—seedling root | ½ Hoagland solution, 200 mM NaCl (24 h)          | TCA/acetone; 2DE MALDI-TOF, MALDI-TOF/TOF | 114 (110 identified—49 salt-responsive, 34 genotypic differences) Up: 14-3-3; Down: tubulin $\alpha$ -3 Genotypic differences: DEAD-box RNA helicase, DWARF3 (GA biosynthesis), eIF5A2, V-ATPase subunit E—higher in T; G-protein $\beta$ subunit, ethylene receptor ETR1—higher in S | [54]      |

Table S1. Cont.

| Plant Material                                                                                                                                                         | Treatment                                 | Methods                                                                                                                         | Major Differentially-Abundant Proteins (DAP)                                                                                                                                                                                                                                       | Reference |
|------------------------------------------------------------------------------------------------------------------------------------------------------------------------|-------------------------------------------|---------------------------------------------------------------------------------------------------------------------------------|------------------------------------------------------------------------------------------------------------------------------------------------------------------------------------------------------------------------------------------------------------------------------------|-----------|
| Common wheat cv. Calingiri, Janz (S), Wyalkatchem (T)—shoot mitochondrial fraction                                                                                     | 200 mM NaCl (increase per 50 mM NaCl/day) | Isolation: PVP gradient; acetone extraction; 2D-DIGE LC-MS/MS                                                                   | 192 DAP (68 identified) Up: AOX, Mn-SOD, VDAC Down: CS, NDPK, outer mitochondrial membrane porin<br>Genotypic differences: AOX, Mn-SOD—higher in T                                                                                                                                 | [98]      |
| Common wheat cv. Zhengmai 9023—leaf                                                                                                                                    | 1, 1.5, 2, 2.5% NaCl (2 days)             | 2D-DIGE Q-TOF-MS                                                                                                                | 125 DAP (52 identified—Up:26—ferritin, H <sup>+</sup> -ATPase, GST, TPI Down: 21                                                                                                                                                                                                   | [81]      |
| Common wheat cvs. Jing-411 (T), Chinese Spring (S)—seedling root                                                                                                       | 0.5, 1.5, 2.5% NaCl (2 days)              | 2DE MALDI-TOF/TOF                                                                                                               | 198 DAP (144 identified genotypic differences: RubisCO LSU binding protein CPN60- $\alpha$ , PR10—higher in T than S                                                                                                                                                               | [58]      |
| Common wheat cv. Keumgang—leaf chloroplast fraction                                                                                                                    | 150 mM NaCl (1, 2, 3 days)                | Isolation: Percoll gradient; TCA/acetone; 2DE LTQ-FTICR-MS                                                                      | 100 DAP (65 identified) Up: RubisCO, GAPDH, GDH, PDX1.2 and PDX1.3 Down: ATP synthase $\alpha,\beta,\gamma$ ; V-ATPase                                                                                                                                                             | [85]      |
| Common wheat ( <i>T. aestivum</i> ) cv Chinese Spring (S), <i>T. aestivum</i> $\times$ <i>Lophopyrum elongatum</i> amphiploid (T)—mitochondrial fraction (shoot, root) | 200 mM NaCl (increase per 50 mM NaCl/day) | 100% acetone (leaf), TCA/acetone (root); 2D-DIGE MALDI-TOF/TOF; HPLC Q-TOF MS/MS (peptide fingerprinting—genotypic differences) | 55 root, 15 shoot differentially abundant proteins<br>Organ-specific differences: aspartate aminotransferase, GDH (up in shoot, down in root) Genotypic differences: Mn-SOD, MDH, aconitase, SHMT, $\beta$ -CAS - higher in T                                                      | [99]      |
| Durum wheat ( <i>T. durum</i> ) cv. Ofanto—leaf                                                                                                                        | 100 mM NaCl (2 days)                      | TCA/acetone 2DE MALDI-TOF                                                                                                       | 38 identified proteins Up (28): TPI; CPN60- $\beta$ , RubisCO activase, carbonic anhydrase; osmolyte biosynthesis-related enzymes (glycine dehydrogenase, SAMS); COR; Cu/Zn-SOD Down (10): ALDO, PGK, RubisCO SSU, OEE1 precursor, $\beta$ -glucosidase, ATP synthase CF1 $\alpha$ | [29]      |



Table S1. Cont.

| Plant Material                                                       | Treatment                                         | Methods                                                             | Major Differentially-Abundant Proteins (DAP)                                                                                                                                                                                  | Reference |
|----------------------------------------------------------------------|---------------------------------------------------|---------------------------------------------------------------------|-------------------------------------------------------------------------------------------------------------------------------------------------------------------------------------------------------------------------------|-----------|
| Durum wheat cv. Waha—seed embryo and surrounding tissue              | 250 mM NaCl (42 h)—AsA priming (0.5 mM)           | KCl (100 mM), acetone/nano HPLC-MS                                  | 697 identified proteins—proteins involved in energy metabolism, protein metabolism, disease/defence, protein destination, storage—a positive effect of AsA priming on mitigation of salinity stress                           | [73,121]  |
| Barley cv OUK305 (T), OUI743 (S)—root                                | 200 mM NaCl (5 days)                              | 40 mM Tris, 8 M urea, 4% CHAPS, 0.2% Bio-Lyte; 2DE nanoLC-ESI-MS/MS | 6 differentially abundant proteins CCOMT, DHAR, GST (2 spots), POX, PR10—higher in T than S                                                                                                                                   | [128]     |
| Barley cv Morex (T), Steptoe (S)—root                                | 100, 150 mM NaCl (13 days)                        | TCA/acetone; 2DE MALDI-TOF; nanoLC-ESI-Q-TOF MS/MS                  | 39 differentially abundant proteins Up: LOX1, POX, SAMS, $\beta$ -1,3-glucanase Down: IDI1, IDI2, IDS2, IDS3, Genotypic differences: class III POX, SAMS—higher in T; APX, MDAR—higher in S                                   | [80]      |
| Barley cv Afzal (T), L-527 (S)—leaf                                  | 300 mM NaCl (increase per 50 mM NaCl/day) 24 h    | TCA/acetone; 2DE MALDI-TOF/TOF                                      | 117 DAP (22 identified proteins) Up: PC, OEE2, PSI subunit VII (PsaC), PRK; 2-Cys Prx, Trx, GST, SOD; TPI, FBP ALDO—higher in T than S                                                                                        | [77]      |
| Barley cv Afzal (T), L-527 (S)—leaf                                  | 300 mM NaCl (increase per 50 mM NaCl/day)—21 days | TCA/acetone; 2DE MALDI-TOF/TOF                                      | 44 DAP Up (43): RubisCO LSU, SSU, RubisCO activase, OEE2; NDPK; GLP; profilin; ribosomal protein L12, 30S ribosomal protein S1; translationally-controlled tumor protein homolog Genotypic differences: DHAR, Trx—higher in S | [76]      |
| Barley cv Morex (T), Steptoe (S)—root                                | 100, 150 mM NaCl (0, 1, 4, 7, 10 days)            | TCA/acetone; 2DE MALDI-TOF; nanoLC-ESI-Q-TOF MS/MS                  | 91 DAP (74 identified proteins) Genotypic differences: GLP3-7, GLP12, $\beta$ -1,3-glucanase, ATP synthase CF1 $\beta$ —higher in T; GLP5a, PR17—higher in S                                                                  | [130]     |
| Barley lines DH14 (S), DH187 (T)—root                                | 100 mM NaCl (6 days)                              | 2DE MALDI-TOF/TOF                                                   | Genotypic differences: annexin, TCTP, LOX, osmotin, V-ATPase—higher in T than S                                                                                                                                               | [72]      |
| Canola ( <i>Brassica napus</i> ) cvs Hyola 308 (T), Sarigol (S)—leaf | 0, 175, 350 mM NaCl                               | 2DE MALDI-TOF/TOF                                                   | 44 DAP (T), 33 DAP (S) (Cu/Zn-SOD, PRK; PSBO2, ATP synthase CF1 $\gamma$ , 30S ribosomal protein S10; RubisCO LSU, SSU)                                                                                                       | [67]      |

Table S1. *Cont.*

| Plant Material                                                              | Treatment                         | Methods                               | Major Differentially-Abundant Proteins (DAP)                                                                                                                      | Reference |
|-----------------------------------------------------------------------------|-----------------------------------|---------------------------------------|-------------------------------------------------------------------------------------------------------------------------------------------------------------------|-----------|
| Grapevine ( <i>Vitis vinifera</i> )—cv. Razegui—leaf, stem, root            | 100 mM NaCl (15 days)             | 2DE Edman sequencing                  | 48 DAP—up: 32; down: 9; 7 newly induced—PR10                                                                                                                      | [127]     |
| Maize ( <i>Zea mays</i> )—hybrid SR12 (T)—leaf chloroplast fraction         | 1, 25 mM NaCl (1, 2, 4 h)         | 2DE MALDI-TOF                         | Up: 12 (ferredoxin-NADP reductase, 23 kDa PSII, FtsH-like; ATP synthase CF1 $\epsilon$ );<br>Down: 8 (ATP synthase CF1 $\alpha$ , LHC <i>a/b</i> binding protein) | [48]      |
| Maize hybrid SR12 (T)—root                                                  | 25 mM NaCl (1 h)                  | 2DE MALDI-TOF                         | Up:FRK, UDP-Glc transferase BX9,<br>2-Cys Prx; 14-3-3, XET Dephosphorylation: CaM,<br>40S ribosomal protein                                                       | [49]      |
| <b>phosphoproteome</b>                                                      |                                   |                                       |                                                                                                                                                                   |           |
| Pea ( <i>Pisum sativum</i> ) cv. Cutlass—root                               | 75, 150 mM NaCl (28, 42, 56 days) | 2DE ESI-Q-TOF-MS/MS                   | 35 DAP—up: IFR, NDPK, PR10, SOD, Hsc82; H <sup>+</sup> -ATPase, V-ATPase                                                                                          | [41]      |
| Potato ( <i>Solanum tuberosum</i> ) cvs Concord (S), Kennebec-(T)—shoot     | 90 mM NaCl                        | 2DE Edman sequencing                  | 47 DAP: Up: calreticulin, TSI-1, osmotin-like, HSP Down: RubisCO, carbonic anhydrase, OEE; GS—more in S than T                                                    | [93]      |
| Soybean ( <i>Glycine max</i> ) cv. Enrei—3-day-old seedling hypocotyl, root | 100 mM NaCl (3 days)              | 2DE Edman sequencing; ESI-Q-TOF-MS/MS | 7 DAP—up: $\beta$ -conglycinin, bHLH protein, elicitor peptide; Down: protease inhibitor, lectin, stem 31 kDa glycoprotein precursor                              | [64]      |
| Soybean cv. Enrei—leaf, hypocotyl, root                                     | 40 mM NaCl (7 days)               | 2DE MALDI-TOF                         | Leaf: 340 (19 identified), hypocotyl 330 (22 identified), root 235 (14 identified) Up: stem 31 kDa glycoprotein; Down: FRK, GAPDH                                 | [95]      |
| Tobacco ( <i>Nicotiana tabacum</i> ) cv. Petit Havana—leaf apoplast         | 100 mM NaCl (20 days)             | 2DE LC-MS/MS                          | 20 DAP (LTP, peroxidase, chitinase, $\alpha$ -galactosidase, $\beta$ -galactosidase, $\beta$ -D-xylosidase)                                                       | [129]     |
| Tobacco cv. Wisconsin—leaf                                                  | 150 mM NaCl                       | 2DE Edman sequencing, MALDI-TOF       | 18 DAP (Up: OEE2, RubisCO SSU; Down: stromal HSP70)                                                                                                               | [92]      |

Table S1. *Cont.*

| Plant Material                                                                                    | Treatment                                                                                    | Methods                                        | Major Differentially-Abundant Proteins (DAP)                                                                                                                                                                                                                                                                                                                                                                     | Reference |
|---------------------------------------------------------------------------------------------------|----------------------------------------------------------------------------------------------|------------------------------------------------|------------------------------------------------------------------------------------------------------------------------------------------------------------------------------------------------------------------------------------------------------------------------------------------------------------------------------------------------------------------------------------------------------------------|-----------|
| Tomato ( <i>Lycopersicon esculentum</i> )—cv's Cervil, Super Marmande (S), Levovil, Roma (T)—root | 100 mM NaCl (14 days)                                                                        | 2DE nanoLC-MS/MS                               | 90 DAP; Up: HSP90; Down: V-ATPase<br>Genotypic differences: Trx-H—increased in S and decreased in T<br>TSI-1, PR10—in all genotypes, highest in Super Marmande                                                                                                                                                                                                                                                   | [124]     |
| <b>Imbalances in Mineral Nutrients</b>                                                            |                                                                                              |                                                |                                                                                                                                                                                                                                                                                                                                                                                                                  |           |
| <b>Boron</b>                                                                                      |                                                                                              |                                                |                                                                                                                                                                                                                                                                                                                                                                                                                  |           |
| Barley Clipper (S) × Sahara (T) DH lines—leaf, root                                               | 1 mM H <sub>3</sub> BO <sub>3</sub> (S), 5 mM H <sub>3</sub> BO <sub>3</sub> (T) for 14 days | PBS pH 7.5, TCA/acetone; 2D-nanoLC-MS/MS iTRAQ | 138 (leaf), 341 (root) identified proteins Up: IDS2, IDS3, methyl-thioribose kinase Leaf: PRK, PGK, PGM, ENO, PC, RubisCO activase, eEF1- $\alpha,\beta,\gamma$ ; eEF-G, eEF-Tu; TLP; Cu/Zn-SOD; 50S ribosomal protein L3; 60S ribosomal protein L1 Root: CCOMT, class III POX, chitinase, 26S proteasome, $\beta$ -1,3-glucanase; ATP synthase CF1 $\beta$ , IDS2, IDS3; Hsp70; Hsc70; 40S ribosomal protein S5 | [79]      |
| White lupin ( <i>Lupinus albus</i> ) cv. Rio Major—leaf                                           | Arnon solution with 0 $\mu$ M B (deficient), 23.1 $\mu$ M B (control)—28 days                | 2DE MALDI-TOF/TOF                              | 23 DAP (9 identified)—PR1, $\beta$ -1,3-glucanase, thamatin-like, expansin-like, class III chitinase                                                                                                                                                                                                                                                                                                             | [39]      |
| <b>Copper</b>                                                                                     |                                                                                              |                                                |                                                                                                                                                                                                                                                                                                                                                                                                                  |           |
| Common wheat cv Yumai 34—leaf, root                                                               | 100 $\mu$ M CuSO <sub>4</sub> (3 days)                                                       | TCA/acetone; 2DE MS/MS                         | 98 DAP (93 identified proteins—43 (leaf), 49 (root)) 36 Cu-responsive proteins Leaf: 14-3-3; MDH, TPI; PDI; V-ATPase A; ATP synthase CF1 $\alpha$ ; carbonic anhydrase, RubisCO activase, PSI subunit VII (PsaC); Root: 14-3-3, translationally-controlled tumor protein; Hsp70, APX, GST, Cu/Zn-SOD, PR10; TPI, ATP synthase CF1 $\alpha$ ; actin 1, tubulin                                                    | [37]      |

Table S1. *Cont.*

| Plant Material                                                                                                                 | Treatment                                                                           | Methods                                 | Major Differentially-Abundant Proteins (DAP)                                                                                                                                                                                                                                                                                                                              | Reference |
|--------------------------------------------------------------------------------------------------------------------------------|-------------------------------------------------------------------------------------|-----------------------------------------|---------------------------------------------------------------------------------------------------------------------------------------------------------------------------------------------------------------------------------------------------------------------------------------------------------------------------------------------------------------------------|-----------|
| <b>Nitrogen</b>                                                                                                                |                                                                                     |                                         |                                                                                                                                                                                                                                                                                                                                                                           |           |
| Common wheat cv Arche, Réctal—leaf                                                                                             | 2, 8, 20 mg N/plant/d for 60 days                                                   | TCA/acetone; 2DE LC-MS/MS               | 76 DAP (14 identified proteins) FBP ALDO, PGK, PGM, ENO2, MDH; RubisCO activase A, OEE1 (PsbO); 2-Cys Prx                                                                                                                                                                                                                                                                 | [90]      |
| <b>Heavy metal stress</b>                                                                                                      |                                                                                     |                                         |                                                                                                                                                                                                                                                                                                                                                                           |           |
| <b>Cadmium</b>                                                                                                                 |                                                                                     |                                         |                                                                                                                                                                                                                                                                                                                                                                           |           |
| Indian mustard ( <i>Brassica juncea</i> ) line PI-173874—root                                                                  | 250 $\mu$ M CdCl <sub>2</sub> (3 days)                                              | 2D-DIGE nanoLC-MS/MS; iTRAQ             | 2D-DIGE: 69 DAP (GST; APX;) iTRAQ: 130 DAP (GST; peroxidase; FE-SOD (up), Cu/Zn-SOD (down)—12% overlap between 2D-DIGE and iTRAQ                                                                                                                                                                                                                                          | [31]      |
| Flax ( <i>Linum usitatissimum</i> )—cvs. Jitka, Tábor—hypocotyl cell suspension culture                                        | 10, 50, 100 $\mu$ M Cd(NO <sub>3</sub> ) <sub>2</sub> for 48 h                      | 2DE MALDI-TOF/TOF                       | 14 DAP (ferritin, GS, lipocalin-1, $\alpha$ -tubulin 3, SAMS, HSP70, HSP83; IFR)                                                                                                                                                                                                                                                                                          | [34]      |
| <b>Combined stress</b>                                                                                                         |                                                                                     |                                         |                                                                                                                                                                                                                                                                                                                                                                           |           |
| <b>Osmotic stress or salinity</b>                                                                                              |                                                                                     |                                         |                                                                                                                                                                                                                                                                                                                                                                           |           |
| Common wheat ( <i>T. aestivum</i> ) Jinan 177 (S), <i>T. aestivum</i> $\times$ <i>Thinopyrum ponticum</i> Shanrong 3 (T)—root, | $\frac{1}{2}$ Hoagland solution 18% PEG-6000 or 200 mM NaCl (24 h)                  | TCA/acetone; 2DE MALDI-TOF/TOF          | 93 (root), 65 (leaf) differentially abundant proteins; 34 (root), 6 (leaf)—genotypic differences PEG: 38 root, 39 leaf; Salinity: 52 root, 52 leaf proteins PEG-specific proteins: ribosomal protein S8 ( $\downarrow$ ) Salt-specific proteins: importin $\alpha$ 1b (root), Genotypic differences: chl <i>a/b</i> binding apoprotein CP24 precursor, DWARF3—higher in T | [47]      |
| <b>leaf</b>                                                                                                                    |                                                                                     |                                         |                                                                                                                                                                                                                                                                                                                                                                           |           |
| <b>Drought and heat</b> Barley—Syrian landrace Arta (T), Australian cv Keel (T)—leaf (heading stage)                           | Drought: 50% FWC (control), 15% FWC (stress) for 3 days Heat: 36 $^{\circ}$ C (4 h) | TCA/acetone; 2DE, 2D-DIGE MALDI-TOF/TOF | 99 DAP Heat-up: FBP ALDO, chaperones, proteases, eEF-G, eIF4A, RubisCO activase B Genotypic differences (14 proteins): photosynthesis-related proteins (LHCII type III Lhcb3, OEE1 PsbO, RubisCO activase B)—higher in Keel than Arta                                                                                                                                     | [91]      |

Table S1. *Cont.*

| Plant Material                                                                                               | Treatment                                                                     | Methods                        | Major Differentially-Abundant Proteins (DAP)                                                                                                                        | Reference |
|--------------------------------------------------------------------------------------------------------------|-------------------------------------------------------------------------------|--------------------------------|---------------------------------------------------------------------------------------------------------------------------------------------------------------------|-----------|
| <b>Drought or waterlogging and cold</b> Winter common wheat cv. Yannong 19—leaf                              | Drought + LT: 35% FWC (7 days) Waterlogging + LT (7 days)                     | TCA/acetone; 2DE MALDI-TOF/TOF | 32 identified proteins Up: DHAR, GR; Hsp70; Down: C metabolism-related proteins (glycolysis, TCA, Krebs cycle), RubisCO activase A, ATP synthase CF1 $\alpha,\beta$ | [143]     |
| Heat or drought—Wheat cv. Vinjett—grain                                                                      | Drought Heat: 32 °C (2 h)                                                     | 2DE MALDI-TOF/TOF              | Both drought and heat: $\alpha$ -amylase inhibitor, LEA, Prx, storage protein Heat only—up: HSP, 14-3-3                                                             | [144]     |
| Cold; drought; herbicide (paraquat) Pea ( <i>Pisum sativum</i> ) cv. Green Feast—leaf mitochondrial fraction | Cold: 4 °C (36 h); Drought: 7 days water withholding; Paraquat: 662.5 mg/L    | 2DE, BN-PAGE, Q-TOF MS         | DAP: GDC, SHMT, HSP70, HSP22, CF1 ATP synthase $\alpha,\beta,\gamma$                                                                                                | [42]      |
| <b>Drought, salinity</b> Grapevine ( <i>Vitis vinifera</i> )—cvs Chardonnay, Cabernet Sauvignon—shoot        | Drought: water withholding Salt: gradual increase 0 to 250 mM NaCl in 16 days | 2DE MALDI-TOF/TOF              | 191 identified proteins—Up: PR10, Prx Genotypic differences: PPR                                                                                                    | [66]      |
| <b>Drought vs. flooding</b> Soybean ( <i>Glycine max</i> ) cv. Enrei—2-day-old seedling root                 | Drought: water withholding Flooding                                           | nanoLC-MS/MS                   | Drought: 97 DAP (Up: cell wall lignification—SAMS) Flooding: 93 DAP (Up: 11 fermentation-related: ADH; Down: SAMS) Both stresses: glycolysis enzymes                | [78]      |
